# Supplementary material for: Microbial Community Response to Granular Peroxide-Based Algaecide Treatment of a Cyanobacterial Harmful Algal Bloom in Lake Okeechobee, Florida (USA)
Source: MDPI journal article supplement (doi:10.3390/toxins16050206), 2024-04-26
Supplement: s1 [file s1]

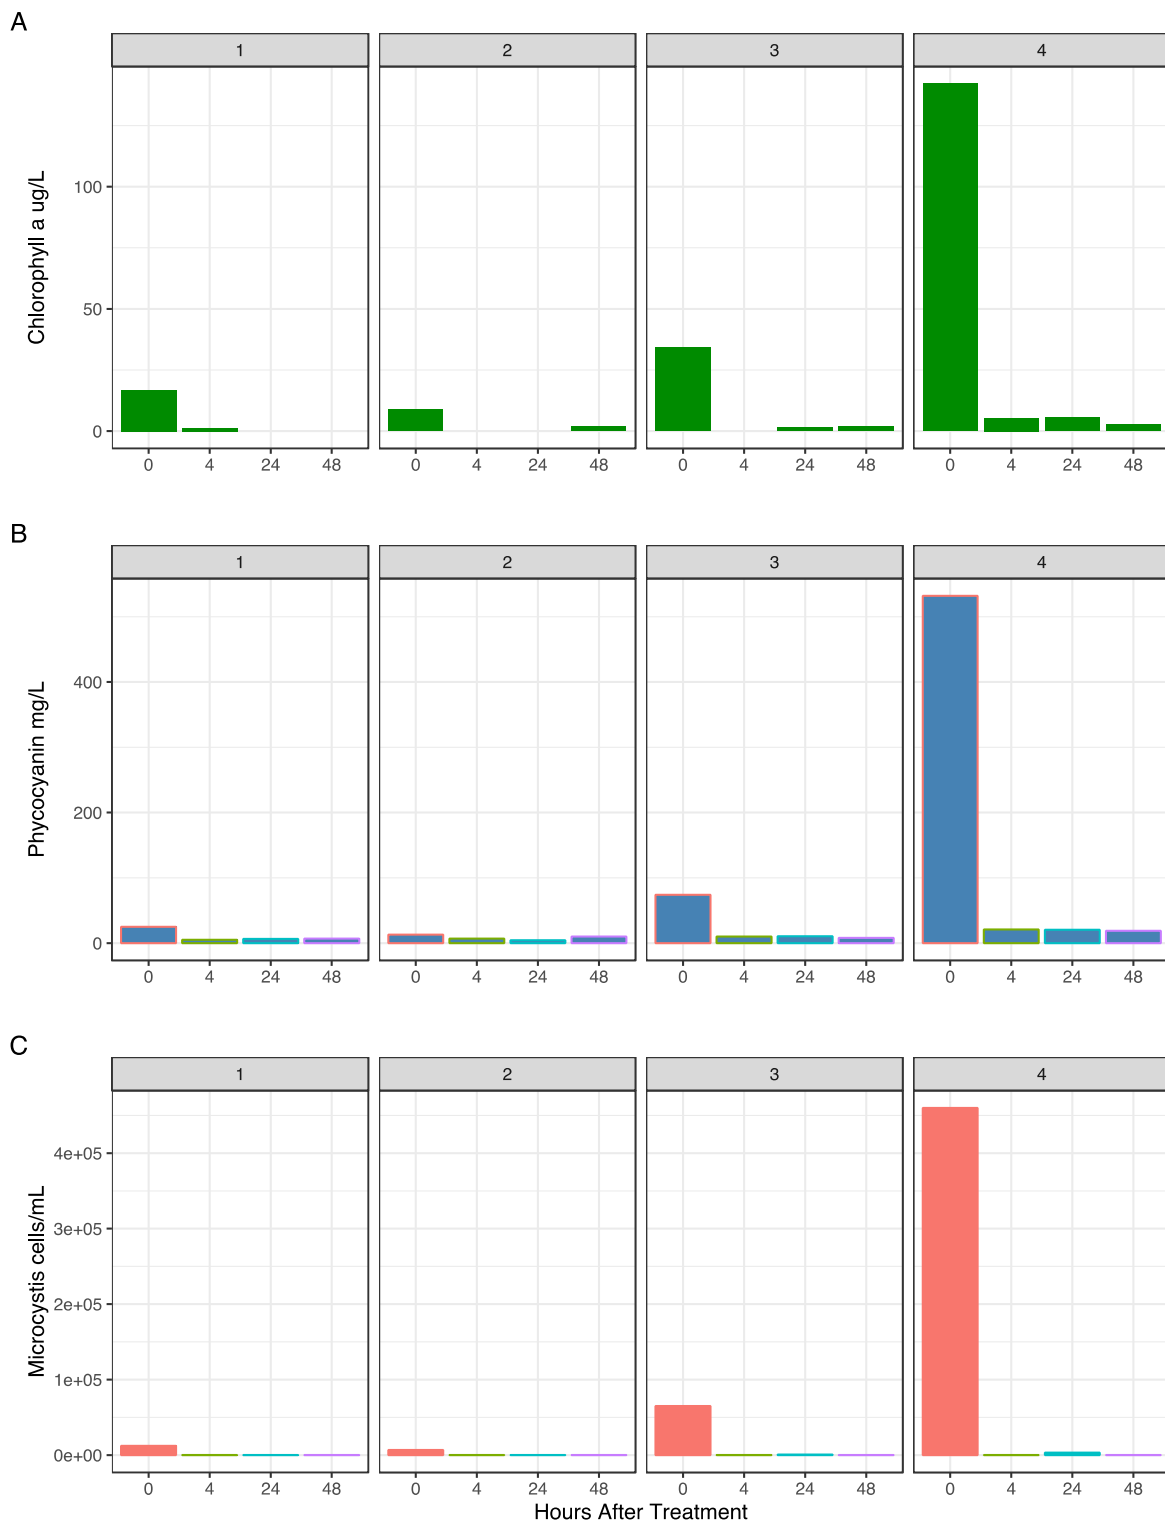

**Figure S1:** Bar plots indicating measures of cyanobacterial abundance grouped by location through time. A: Chlorophyll a concentration. B: Phycocyanin concentration. C: Microcystis counts.

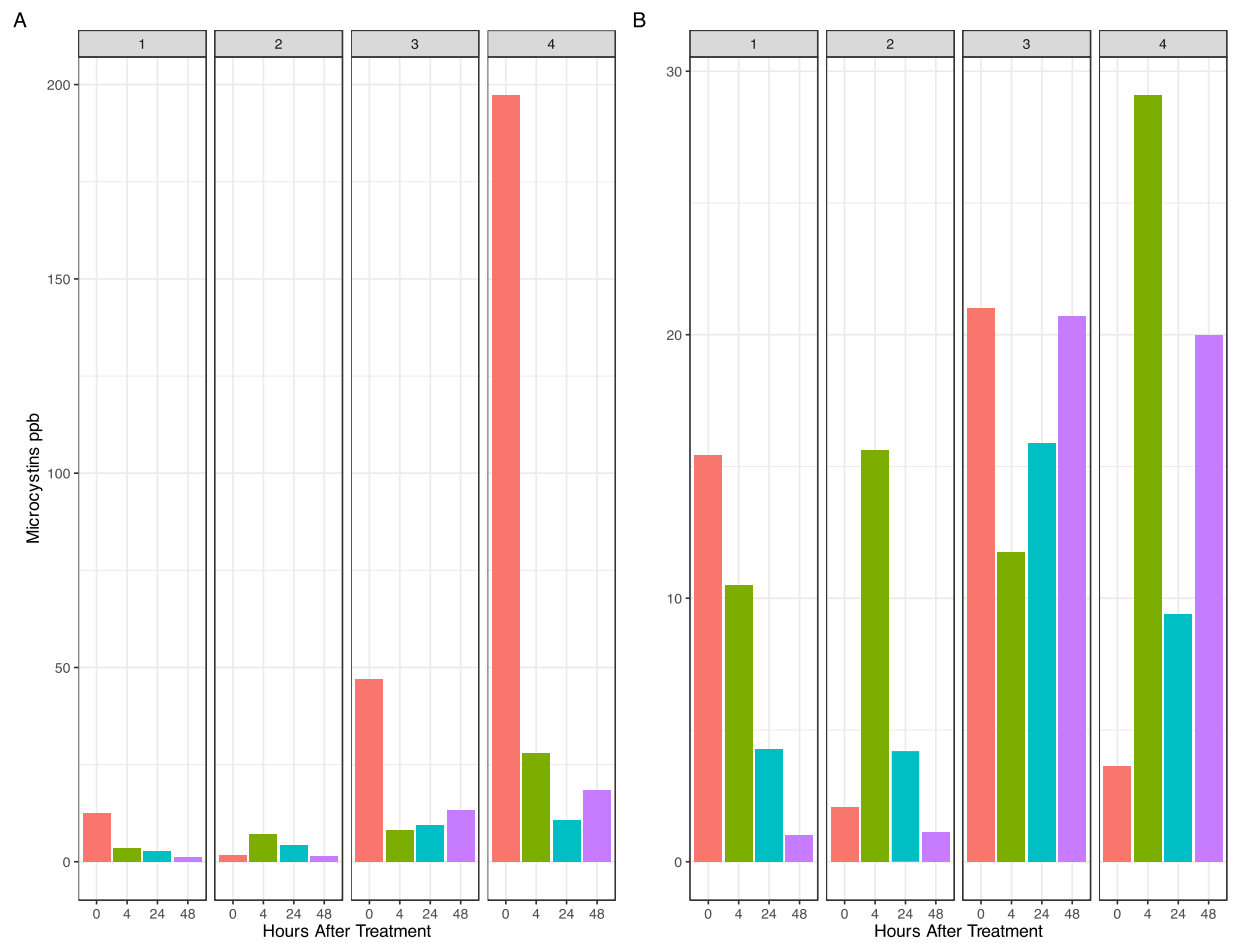

**Figure S2:** Bar plots indicating microcystin concentration through time. (A) Total microcystins (B) Aqueous microcystins.

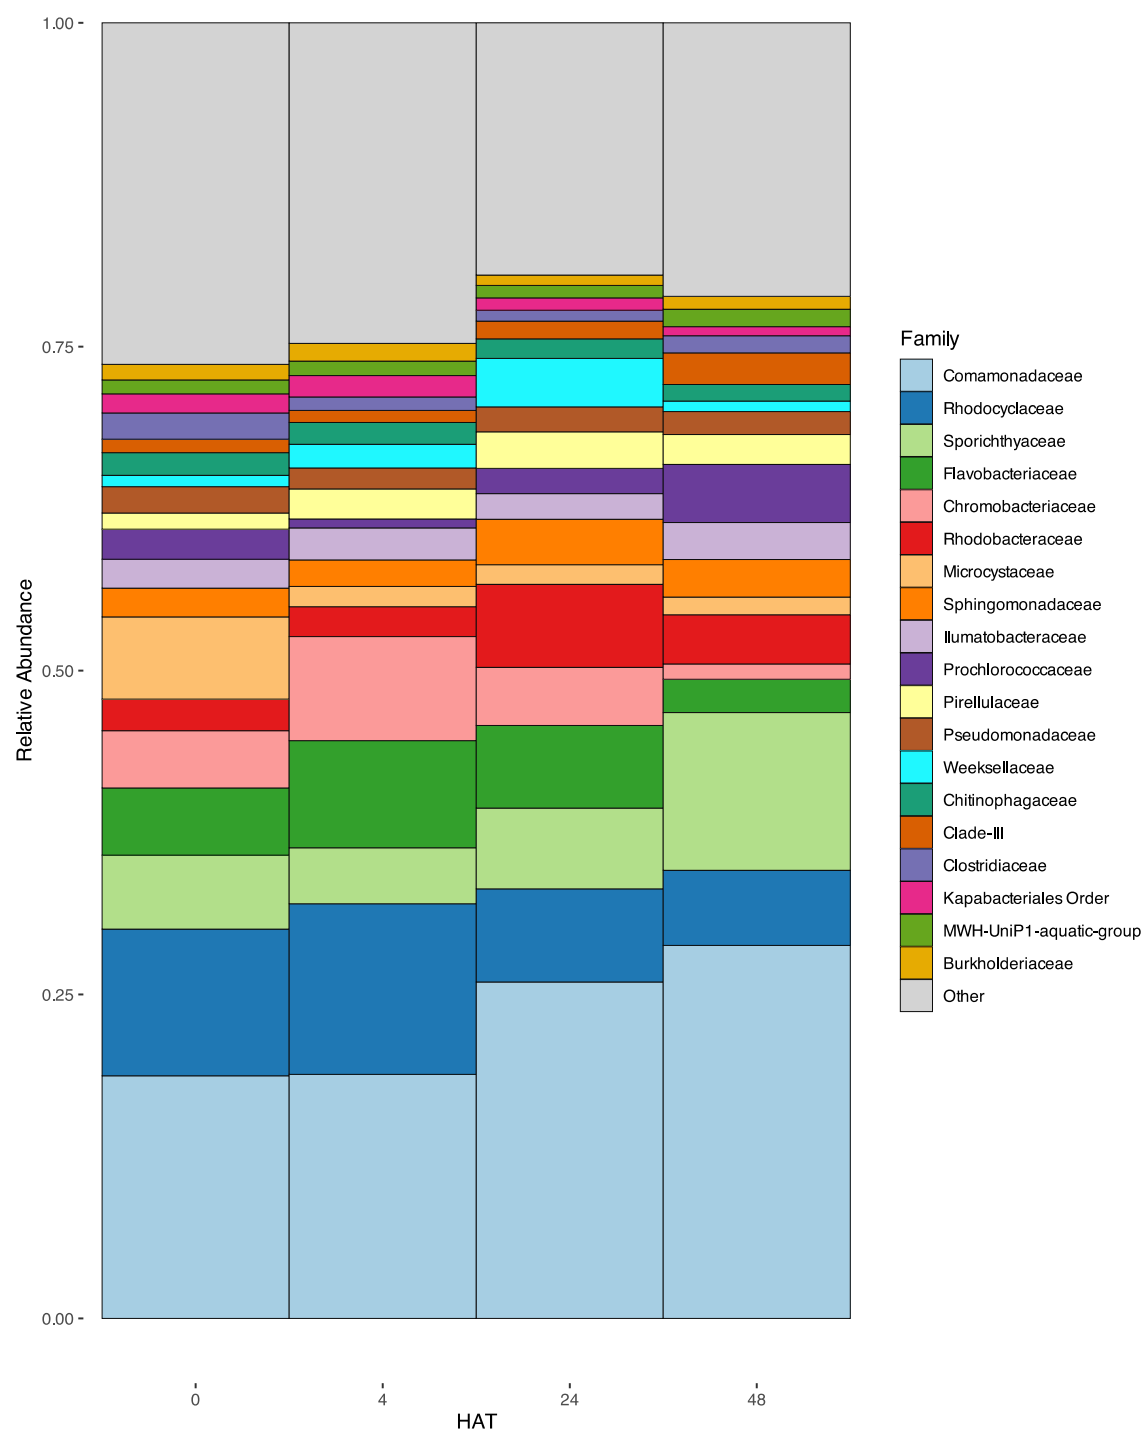

**Figure S3:** Bar plots of the relative abundance of the top 20 more abundant bacterial families found during the study, grouped by hours after treatment.
